# Supplementary material for: Cathodic generation of reactive (phenylthio)difluoromethyl species and its reactions: mechanistic aspects and synthetic applications
Source: publisher site journal article supplement (doi:10.3762/bjoc.18.88), 2022-07-20
Supplement: Additional file 1 [file 1860-5397-18-88-S1.pdf]

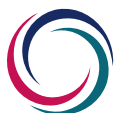

## Supporting Information

for

### **Cathodic generation of reactive (phenylthio)difluoromethyl species and its reactions: mechanistic aspects and synthetic applications**

Sadanobu Iwase, Shinsuke Inagi and Toshio Fuchigami

*Beilstein J. Org. Chem.* **2022**, *18*, 872–880. [doi:10.3762/bjoc.18.88](https://doi.org/10.3762/bjoc.18.88)

### **Experimental section: general information, materials, and general procedure for cathodic reduction of compound 1**

# Experimental

## General information

$^1\text{H}$ ,  $^{13}\text{C}$ , and  $^{19}\text{F}$  NMR spectra were recorded on a JEOL JNM EX-270 ( $^1\text{H}$ : 270 MHz,  $^{13}\text{C}$ : 67.8 MHz,  $^{19}\text{F}$ : 254.05 MHz) spectrometer in  $\text{CDCl}_3$ . The chemical shifts for  $^1\text{H}$  NMR and  $^{13}\text{C}$  NMR are given in  $\delta$  (ppm) downfield from internal TMS and  $\text{CDCl}_3$ , respectively.  $^{19}\text{F}$  NMR chemical shifts are given in  $\delta$  (ppm) upfield from external trifluoroacetic acid. Oxidation potentials ( $E_{\text{p}}^{\text{ox}}$ ) were measured in 0.1 M  $\text{Bu}_4\text{NClO}_4/\text{MeCN}$  at a scan rate of 100 mV/s by cyclic voltammetry using an ALS Instruments model 600 A. A platinum electrode ( $\varphi = 1$  mm) and a platinum wire ( $\varphi = 1$  mm  $\times$  30 mm) were used as working and counter electrodes, respectively. A saturated sodium chloride calomel electrode (SSCE) was used as a reference electrode. Preparative electrolysis experiments were carried out with a Hokuto Denko HABF 501 potentiostat/galvanostat. Mass spectra and high resolution mass spectra were obtained with a Shimadzu GCMS-QP-2000A or JEOL JMS-700 mass spectrometer. Deuterium incorporation to products **2** and **4** were determined by MS analyses.  $^{19}\text{F}$  NMR yields were estimated with  $\alpha,\alpha,\alpha$ -trifluorotoluene as an internal standard.

## Materials

Dry MeCN was obtained by distillation in the presence of  $\text{CaH}_2$  under nitrogen gas. THF and ether were dried over Na/benzophenone under reflux and distilled under nitrogen gas. The starting material, bromodifluoromethyl phenyl sulfide (**1**) was prepared by the modification of the known procedures [1] as follows.

Thiophenol (0.1 mol) was added dropwise to a stirred solution of 100 mL of dry THF containing NaH (0.11 mol) under a nitrogen atmosphere at room temperature. After 30 min, the solution was cooled to  $-10\text{ }^{\circ}\text{C}$ , and cooled  $\text{CBr}_2\text{F}_2$  (0.11 mol) was added dropwise to the solution of PhSNa in THF using a syringe. After 2 h, the solution was warmed to room temperature and stirred for 1 h. The solution was mixed with water, the product was extracted with ether for three times, and then the combined extracts were washed with brine followed by drying with anhydrous  $\text{Na}_2\text{SO}_4$ . The solvent was removed by evaporation, the remaining oil was distilled at  $54\text{ }^{\circ}\text{C}$  under reduced pressure (3 mmHg) to give bromodifluoromethyl sulfide (**1**) in 85% yield.

$^1\text{H}$  NMR,  $\delta = 7.38\text{--}7.68$  (m, 5H,  $\text{C}_6\text{H}_5$ );  $^{19}\text{F}$  NMR  $\delta = 54.43$  (s, 2F,  $\text{SCF}_2\text{Br}$ );  $^{13}\text{C}$  NMR  $\delta = 119.25, 127.17, 129.43, 131.03, 136.37$ ; MS, 240 ( $\text{M}^{+2}$ ), 238 ( $\text{M}^{+}$ ), 159 ( $\text{M}^{+}\text{-Br}$ ), 109 ( $\text{M}^{+}\text{-CF}_2\text{Br}$ ), 77 ( $\text{Ph}^{+}$ ).

### General procedure for the cathodic reduction of **1**

Constant current and constant potential electrochemical reduction of **1** (2.5 mmol) was carried out with a platinum cathode and anode (2 cm  $\times$  2 cm) in a divided glass cell with a glass frit separator containing 25 mL of 0.8 M  $\text{Bu}_4\text{NClO}_4/\text{MeCN}$  in the presence or absence of trapping olefins (10 mmol) such as  $\alpha$ -methylstyrene and 1,1-diphenylethylene as a catholyte until **1** was completely consumed (monitored by TLC and GC-MS). After electrolysis, the NMR yield of products **2–5** were estimated from  $^{19}\text{F}$  NMR spectra using  $\text{CF}_3\text{C}_6\text{H}_5$  as an internal standard. After the estimation, the crude mixture was passed through a short column with silica gel to remove the supporting electrolyte, and the eluent was subjected to PTLC (eluent: hexane/AcOEt 9:1), and products **2–4** and **6** were isolated. 1,1-Difluoro-2-methyl-2-phenylcycopropane (**5**) [2]

was detected by MS and HRMS spectra. MS:  $m/z$  168 ( $M^+$ ), 149 ( $M^+-F$ ), 77 ( $Ph^+$ ); HRMS:  $m/z$  calcd for  $C_{10}H_{10}F_2$ : 168.0751, found 168.0743.

The known compounds, **2** [3] and **3** [4] were identified by comparison of the spectral data with those reported in the literature.

1,1-Difluoro-1-phenylthio-3-phenylbutane (**4**).

$^1H$  NMR,  $\delta$  = 7.19–7.58 (m, 10H,  $C_6H_5$ ), 3.21 (m, 1H,  $CHPh$ ), 2.43 (m, 2H,  $CF_2CH_2$ ), 1.35 (d,  $J$  = 7.3 Hz, 3H,  $CH_3$ );  $^{19}F$  NMR  $\delta$  = 7.2 (dd,  $J$  = 204, 16 Hz, 1F,  $SCFFCH_2$ ), 4.8 (ddd,  $J$  = 206, 15, 12 Hz, 1F,  $CF_2CH_2$ ); MS:  $m/z$  278 ( $M^+$ ), 159 ( $PhSCF_2^+$ ), 153 ( $M^+-PhCHCH_3$ ), 109 ( $PhS^+$ ), 105 ( $M^+-PhSCF_2CH_2$ ), 77 ( $Ph^+$ ); HRMS:  $m/z$  calcd for  $C_{16}H_{16}F_2S$ : 278.0941, found 278.0940.

1,1-Difluoro-1-phenylthio-3,3-diphenylpropane (**6**)

$^1H$  NMR,  $\delta$  = 7.18–7.54 (m, 15H,  $C_6H_5$ ), 4.41 (t,  $J$  = 6.9 Hz, 1H,  $Ph_2CHCH_2$ ), 2.96 (dt,  $J$  = 15.0 Hz, 2H,  $CF_2CH_2CH$ );  $^{19}F$  NMR  $\delta$  = 5.96 (t,  $J$  = 14.7, 2F,  $SCF_2CH_2$ ); MS:  $m/z$  340 ( $M^+$ ), 230 ( $M^+-PhSH$ ), 152 ( $M^+-PhSH-PhH$ ), 109 ( $PhS^+$ ), 77 ( $Ph^+$ ); HRMS:  $m/z$  calcd for  $C_{21}H_{18}F_2S$ : 340.1097, found 340.1094.

Deuterated products **7** and **8** were identified by  $^{19}F$  NMR and MS spectra as follows.

$\alpha$ -Deuterio- $\alpha,\alpha$ -difluoromethyl phenyl sulfide (**2D**)

$^{19}F$  NMR  $\delta$  = -15.83 (t,  $J$  = 8.7 Hz, 1F,  $SCF_2D$ ); MS:  $m/z$  161 ( $M^+$ ), 111 ( $M^+-CF_2$ ), 109 ( $PhS^+$ ), 77( $Ph^+$ ).

3-Deuterio-1,1-difluoro-1-phenylthio -3-phenylbutane (**4D**)

$^{19}F$  NMR  $\delta$  = 7.1 (m, 1F,  $SCFFCH_2$ ), 4.8 (dt,  $J$  = 203, 14 Hz, 1F,  $SCFFCH_2$ ); MS:  $m/z$  279 ( $M^+$ ), 259 ( $M^+-HF$ ), 109 ( $PhS^+$ ), 106 ( $M^+-PhSCF_2CH_2$ ), 77 ( $Ph^+$ ).

## References

1. Toulgoat, F.; Langlois, B. R.; Médebielle, M.; Sanchez, J.-Y. *J. Org. Chem.* **2007**, *72*, 9046-9052. doi: 10.1021/jo701318n
2. Dolbier W. R., Jr.; Wojtowicz, H.; Burkholder, C. R. *J. Org. Chem.*, **1990**, *55*, 5420–5422. doi: 10.1021/jo00306a027
3. Burton, D. J.; Wiemers, D. M. *J. Fluorine Chem.*, **1981**, *18*, 573–582. doi: 10.1016/S0022-1139(00)82673-1
4. Rico, I.; Wakselman, C. *Tetrahedron Lett.* **1981**, *22*, 323–326. doi: 10.1016/0040-4039(81)80087-1
